# Supplementary material for: Development of a pigment-based whole-cell biosensor for the analysis of environmental copper
Source: Royal Society of Chemistry journal article supplement (doi:10.1039/c7ra03778c), 2017-01-01
Supplement: c7ra03778c1.pdf [file c7ra03778c1.pdf]

## SUPPORTING INFORMATION

Pei-Hsuan Chen, Chieh Lin, Kai-Hong Kuo, and Yi-Chun Yeh\*  
Department of Chemistry, National Taiwan Normal University

## Materials and Methods

### Bacterial strains and growth conditions

Details of plasmid construction including strains, plasmids, and primers were listed in Table S1, S2 and S3. *E. coli* DH5 $\alpha$  cells were used as the host for molecular cloning. Cells were cultivated at 37°C in LB broth with shaking at 250 rpm. *R. eutropha* and *C. metallidurans* cells were used as the hosts for whole-cell biosensor, and were incubated at 28°C in LB with shaking at 200 rpm. Standard protocols for conjugation with *E. coli* strain S17-1 were used to generate *R. eutropha* H16 and *C. metallidurans* CH34 strains, as previously described.<sup>1</sup>

### Metal ions induction

Single colonies were streaked from glycerol stock, and were inoculated in LB with 15  $\mu\text{g}/\text{mL}$  gentamycin (Amresco), or 200  $\mu\text{g}/\text{mL}$  kanamycin (Amresco) for overnight. Cells were diluted in LB at a ratio of 1:50 (v/v) and grown until reaching OD<sub>600</sub> of 0.4~0.6. After that, cells were induced in triplicate with metal salt and grown for 24 hours in the case of RFP fluorescence measurement and for 4 hours in the case of betaxanthin fluorescence measurement. The metal salts were CuCl<sub>2</sub> (Acros Organics), Fe(NO<sub>3</sub>)<sub>3</sub>·9H<sub>2</sub>O (Acros Organics), CoCl<sub>2</sub>·6H<sub>2</sub>O (Acros Organics), NiSO<sub>4</sub>·6H<sub>2</sub>O (Acros Organics), ZnSO<sub>4</sub>·7H<sub>2</sub>O (KISHIDA), and PbNO<sub>3</sub> (Acros Organics). All metal salts were analytical grade and the solutions are prepared using double distilled water that has been purified by a MilliQ purification system (Millipore).

### Water sample detection

Overnight cultures were diluted in LB, and were grown to an OD<sub>600</sub> of 0.4~0.6 as described above. After being centrifuged and resuspended in 1:1 (v/v) ratio of 2X LB to tap water or fresh pond water (pond at National Taiwan Normal University) in the presence of appropriate antibiotics, cells were induced with different concentrations of CuCl<sub>2</sub> and cells were grown for 24 hours before RFP fluorescence measurement.

## **RFP fluorescence intensity assay**

After cells were induced with metal salt as described above, 300  $\mu$ L of cell culture was transferred to 96-well microplate. RFP intensity (excitation/emission filters: 530 nm/590 nm) was measured using Synergy HT (BioTeK), and OD<sub>600</sub> for normalization. Induction coefficient (IC) is the ratio between the normalized fluorescence intensity of the cells induced with metal ions and without metal ions.

## **Betaxanthin fluorescence intensity assay**

After cells were grown with different concentrations of CuCl<sub>2</sub> for 4 hours, L-DOPA was added to the cells as the substrate of DOPA 4,5-Dioxygenase from *Mirabilis jalapa* (MjDOD) to a final concentration of 1 mM for 2 hours. Cell pellet was resuspended in PBS buffer for OD<sub>600</sub> measurement. Betaxanthin fluorescence intensity (excitation/emission filters: 485 nm/528 nm) was measured using Synergy HT (BioTeK).

## **Determination of LOD (limit of detection)**

The equation of LOD was used as below:

$$\text{LOD} = 3(\text{STEYX}/\text{SLOPE})$$

Where STEYX is the standard error of the predicted fluorescence/OD<sub>600</sub> value in the regression, and SLOPE is the slope of the calibration line.

**Table S1.** Bacterial Strains Used in This Study

| <b>Strains</b>                      | <b>Relevant genotype</b>                                                                                                                                           | <b>Source</b>                                                                              |
|-------------------------------------|--------------------------------------------------------------------------------------------------------------------------------------------------------------------|--------------------------------------------------------------------------------------------|
| <b><i>E. coli</i> DH5a</b>          | F <sup>-</sup> endA1 glnV44 thi-1 recA1<br>relA1 gyrA96 deoR nupG<br>Φ80dlacZΔM15<br>Δ(lacZYA-argF)U169<br>hsdR17(rK <sup>-</sup> mK <sup>+</sup> ) λ <sup>-</sup> | Purchased from Protech<br>Technology                                                       |
| <b><i>C. metallidurans</i> CH34</b> | Wild type                                                                                                                                                          | Purchased from BCRC<br>(Bioresource Collection and<br>Research Center, Taiwan).            |
| <b><i>R. eutropha</i> H16</b>       | Wild type                                                                                                                                                          | DSM 428 Purchased from<br>BCRC (bioresource<br>collection and research<br>center, Taiwan). |
| <b>YCY_337</b>                      | <i>R. eutropha</i> H16<br><i>copS(rev)-copR(rev)-PcopS/R</i><br><i>(rev)-PcopA-rfp</i>                                                                             | pYCY_325 conjugated into<br><i>R. eutropha</i> H16.                                        |
| <b>YCY_338</b>                      | <i>C. metallidurans</i> CH34<br><i>copS(rev)-copR(rev)-PcopS/R</i><br><i>(rev)-PcopA-rfp</i>                                                                       | pYCY_325 conjugated into<br><i>C. metallidurans</i> CH34.                                  |
| <b>YCY_423</b>                      | <i>R. eutropha</i> H16<br><i>copS(rev)-copR(rev)-PcopS/R</i><br><i>(rev)-PcopF-rfp</i>                                                                             | pYCY_417 conjugated into<br><i>R. eutropha</i> H16.                                        |
| <b>YCY_424</b>                      | <i>C. metallidurans</i> CH34<br><i>copS(rev)-copR(rev)-PcopS/R</i><br><i>(rev)-PcopF-rfp</i>                                                                       | pYCY_417 conjugated into<br><i>C. metallidurans</i> CH34.                                  |
| <b>YCY_437</b>                      | <i>C. metallidurans</i> CH34<br><i>copS(rev)-copR(rev)-PcopS/R</i><br><i>(rev)-PcopH-rfp</i>                                                                       | pYCY_433 conjugated into<br><i>C. metallidurans</i> CH34.                                  |
| <b>YCY_448</b>                      | <i>R. eutropha</i> H16<br><i>copS(rev)-copR(rev)-PcopS/R</i><br><i>(rev)-PcopH-rfp</i>                                                                             | pYCY_433 conjugated into<br><i>R. eutropha</i> H16.                                        |
| <b>YCY_490</b>                      | <i>C. metallidurans</i> CH34<br><i>copS(rev)-copR(rev)-PcopS/R</i><br><i>(rev)-PcopE-rfp</i>                                                                       | pYCY_475 conjugated into<br><i>C. metallidurans</i> CH34.                                  |
| <b>YCY_491</b>                      | <i>C. metallidurans</i> CH34<br><i>copS(rev)-copR(rev)-PcopS/R</i><br><i>(rev)-PcopL-rfp</i>                                                                       | pYCY_476 conjugated into<br><i>C. metallidurans</i> CH34.                                  |
| <b>YCY_492</b>                      | <i>C. metallidurans</i> CH34<br><i>copS(rev)-copR(rev)-PcopS/R</i><br><i>(rev)-PcopM-rfp</i>                                                                       | pYCY_477 conjugated into<br><i>C. metallidurans</i> CH34.                                  |
| <b>YCY_493</b>                      | <i>C. metallidurans</i> CH34<br><i>copS(rev)-copR(rev)-PcopS/R</i><br><i>(rev)-PcopQ-rfp</i>                                                                       | pYCY_478 conjugated into<br><i>C. metallidurans</i> CH34.                                  |
| <b>YCY_494</b>                      | <i>C. metallidurans</i> CH34<br><i>copS(rev)-copR(rev)-PcopS/R</i>                                                                                                 | pYCY_479 conjugated into<br><i>C. metallidurans</i> CH34.                                  |

|                |                                                                                                  |                                                           |
|----------------|--------------------------------------------------------------------------------------------------|-----------------------------------------------------------|
|                | <i>(rev)-PcopT-rfp</i>                                                                           |                                                           |
| <b>YCY_495</b> | <i>R. eutropha</i> H16<br><i>copS(rev)-copR(rev)-PcopS/R</i><br><i>(rev)-PcopE-rfp</i>           | pYCY_475 conjugated into<br><i>R. eutropha</i> H16.       |
| <b>YCY_496</b> | <i>R. eutropha</i> H16<br><i>copS(rev)-copR(rev)-PcopS/R</i><br><i>(rev)-PcopL-rfp</i>           | pYCY_476 conjugated into<br><i>R. eutropha</i> H16.       |
| <b>YCY_497</b> | <i>R. eutropha</i> H16<br><i>copS(rev)-copR(rev)-PcopS/R</i><br><i>(rev)-PcopM-rfp</i>           | pYCY_477 conjugated into<br><i>R. eutropha</i> H16.       |
| <b>YCY_498</b> | <i>R. eutropha</i> H16<br><i>copS(rev)-copR(rev)-PcopS/R</i><br><i>(rev)-PcopQ-rfp</i>           | pYCY_478 conjugated into<br><i>R. eutropha</i> H16.       |
| <b>YCY_499</b> | <i>R. eutropha</i> H16<br><i>copS(rev)-copR(rev)-PcopS/R</i><br><i>(rev)-PcopT-rfp</i>           | pYCY_479 conjugated into<br><i>R. eutropha</i> H16.       |
| <b>YCY_547</b> | <i>C. metallidurans</i> CH34<br><i>copS(rev)-copR(rev)-PcopS/R</i><br><i>(rev)-PcopQ-MjDOD</i>   | pYCY_543 conjugated into<br><i>C. metallidurans</i> CH34. |
| <b>YCY_564</b> | <i>C. metallidurans</i> CH34<br><i>copS(rev)-copR(rev)-PcopS/R</i><br><i>(rev)-mPcopE(G)-rfp</i> | pYCY_562 conjugated into<br><i>C. metallidurans</i> CH34. |
| <b>YCY_567</b> | <i>C. metallidurans</i> CH34<br><i>copS(rev)-copR(rev)-PcopS/R</i><br><i>(rev)-mPcopF(G)-rfp</i> | pYCY_565 conjugated into<br><i>C. metallidurans</i> CH34. |
| <b>YCY_570</b> | <i>C. metallidurans</i> CH34<br><i>copS(rev)-copR(rev)-PcopS/R</i><br><i>(rev)-mPcopL(G)-rfp</i> | pYCY_568 conjugated into<br><i>C. metallidurans</i> CH34. |

**Table S2.** Plasmids Used in This Study

| Plasmids | Relevant genotype                                                                        | Construction and source                                                                                                                                                                                                                                |
|----------|------------------------------------------------------------------------------------------|--------------------------------------------------------------------------------------------------------------------------------------------------------------------------------------------------------------------------------------------------------|
| pYCY_037 | pBBR1MCS plasmid with <i>pBAD-rfp, Kan<sup>R</sup></i>                                   | <sup>2</sup>                                                                                                                                                                                                                                           |
| pYCY_325 | pBBR1MCS plasmid with <i>copS(rev)-copR(rev)-PcopS/R(rev)-PcopA-rfp, Kan<sup>R</sup></i> | PCR fragments of <i>copS(rev)-copR(rev)-PcopS/R(rev)-PcopA</i> were amplified with primers 209 and 182, from <i>C. metallidurans</i> CH34 pMOL30 as the template. The PCR products were treated with EcoRV and NdeI, and cloned into plasmid pYCY_037. |
| pYCY_414 | pBBR1MCS plasmid with <i>copS(rev)-copR(rev)-PcopS/R(rev)-rfp, Kan<sup>R</sup></i>       | PCR fragments of <i>copS(rev)-copR(rev)-PcopS/R(rev)</i> were amplified with primers 209 and 286, from <i>C. metallidurans</i> CH34 pMOL30 as the template. The PCR products were treated with EcoRV and NdeI, and cloned into plasmid pYCY_037.       |
| pYCY_417 | pBBR1MCS plasmid with <i>copS(rev)-copR(rev)-PcopS/R(rev)-PcopF-rfp, Kan<sup>R</sup></i> | PCR fragments of <i>PcopF</i> were amplified with primers 289 and 290, from <i>C. metallidurans</i> CH34 pMOL30 as the template. The PCR products were treated with XbaI and NdeI, and cloned into plasmid pYCY_414.                                   |
| pYCY_433 | pBBR1MCS plasmid with <i>copS(rev)-copR(rev)-PcopS/R(rev)-PcopH-rfp, Kan<sup>R</sup></i> | PCR fragments of <i>PcopH</i> were amplified with primers 287 and 288, from <i>C. metallidurans</i> CH34 pMOL30 as the template. The PCR products were treated with XbaI and NdeI, and cloned into plasmid pYCY_414.                                   |
| pYCY_475 | pBBR1MCS plasmid with <i>copS(rev)-copR(rev)-PcopS/R(rev)-PcopE-rfp, Kan<sup>R</sup></i> | PCR fragments of <i>PcopE</i> were amplified with primers 376 and 377, from <i>C. metallidurans</i> CH34 pMOL30 as the template. The PCR products were treated with XbaI and NdeI, and cloned into plasmid pYCY_414.                                   |
| pYCY_476 | pBBR1MCS plasmid with <i>copS(rev)-copR(rev)-PcopS/R(rev)-PcopL-rfp, Kan<sup>R</sup></i> | PCR fragments of <i>PcopL</i> were amplified with primers 372 and 373, from <i>C. metallidurans</i> CH34 pMOL30 as the template. The PCR products were treated with XbaI and NdeI, and cloned into plasmid pYCY_414.                                   |
| pYCY_477 | pBBR1MCS plasmid with <i>copS(rev)-copR(rev)-PcopS/</i>                                  | PCR fragments of <i>PcopM</i> were amplified with primers 380 and 381,                                                                                                                                                                                 |

|                 |                                                                                              |                                                                                                                                                                                                                                                                                                                                                                                                                                                            |
|-----------------|----------------------------------------------------------------------------------------------|------------------------------------------------------------------------------------------------------------------------------------------------------------------------------------------------------------------------------------------------------------------------------------------------------------------------------------------------------------------------------------------------------------------------------------------------------------|
|                 | <i>R(rev)-PcopM-rfp, Kan<sup>R</sup></i>                                                     | from <i>C. metallidurans</i> CH34 pMOL30 as the template. The PCR products were treated with XbaI and NdeI, and cloned into plasmid pYCY_414.                                                                                                                                                                                                                                                                                                              |
| <b>pYCY_478</b> | pBBR1MCS plasmid with <i>copS(rev)-copR(rev)-PcopS/R(rev)-PcopQ-rfp, Kan<sup>R</sup></i>     | PCR fragments of <i>PcopQ</i> were amplified with primers 374 and 375, from <i>C. metallidurans</i> CH34 pMOL30 as the template. The PCR products were treated with XbaI and NdeI, and cloned into plasmid pYCY_414.                                                                                                                                                                                                                                       |
| <b>pYCY_479</b> | pBBR1MCS plasmid with <i>copS(rev)-copR(rev)-PcopS/R(rev)-PcopT-rfp, Kan<sup>R</sup></i>     | PCR fragments of <i>PcopT</i> were amplified with primers 378 and 379, from <i>C. metallidurans</i> CH34 pMOL30 as the template. The PCR products were treated with XbaI and NdeI, and cloned into plasmid pYCY_414.                                                                                                                                                                                                                                       |
| <b>pYCY_543</b> | pBBR1MCS plasmid with <i>copS(rev)-copR(rev)-PcopS/R(rev)-PcopQ-MjDOD, Kan<sup>R</sup></i>   | PCR fragments of <i>MjDOD</i> were amplified with primers 396 and 397, from pDEST15 <sup>3</sup> as a template. The PCR products were treated with NdeI and XhoI, and cloned into plasmid pYCY_037 to replace <i>rfp</i> and get the plasmid <i>pBAD-MjDOD</i> . Plasmid <i>pBAD-MjDOD</i> was treated with NdeI and NotI to get <i>MjDOD-mob</i> as insert fragment. <i>MjDOD-mob</i> fragments were cloned into plasmid pYCY_478 to replace <i>rfp</i> . |
| <b>pYCY_562</b> | pBBR1MCS plasmid with <i>copS(rev)-copR(rev)-PcopS/R(rev)-mPcopE(G)-rfp, Kan<sup>R</sup></i> | PCR fragments of <i>mPcopE(G)</i> were amplified with primers 377 and 434, from <i>C. metallidurans</i> CH34 pMOL30 as the template. The PCR products were treated with XbaI and NdeI, and cloned into plasmid pYCY_414.                                                                                                                                                                                                                                   |
| <b>pYCY_565</b> | pBBR1MCS plasmid with <i>copS(rev)-copR(rev)-PcopS/R(rev)-mPcopF(G)-rfp, Kan<sup>R</sup></i> | PCR fragments of <i>mPcopF(G)</i> were amplified with primers 290 and 435, from <i>C. metallidurans</i> CH34 pMOL30 as the template. The PCR products were treated with XbaI and NdeI, and cloned into plasmid pYCY_414.                                                                                                                                                                                                                                   |
| <b>pYCY_568</b> | pBBR1MCS plasmid with <i>copS(rev)-copR(rev)-PcopS/R(rev)-mPcopL(G)-rfp, Kan<sup>R</sup></i> | PCR fragments of <i>mPcopL(G)</i> were amplified with primers 373 and 436, from <i>C. metallidurans</i> CH34 pMOL30 as the template. The PCR products were treated with XbaI and NdeI, and cloned into plasmid pYCY_414.                                                                                                                                                                                                                                   |

**Table S3. Primers Used in This Study**

| <b>Primers</b>          | <b>Sequence (5' → 3')</b>                                     |
|-------------------------|---------------------------------------------------------------|
| 0182_PcopA 3' NdeI+RBS  | TTTTCATATGTATATCTCCTTCTTAAAgaaaatag<br>tcctttcgettgaatgg      |
| 0209_copS(rev) 5' EcoRV | TTTTGATATCtcaggtcagtcaggcgac                                  |
| 0286_PcopR 3' XbaI+NdeI | TTTTCATATGTTTTTCTAGAggggtcacctcgggtcgta<br>ctg                |
| 0287_PcopH 5' XbaI      | TTTTTCTAGAgagctttccgagttgtaacgggtggg                          |
| 0288_PcopH 3' NdeI+RBS  | TTTTCATATGTATATCTCCTTCTTAAAgatgttctc<br>ctataagtttcgggcctaacc |
| 0289_PcopF 5' XbaI      | TTTTTCTAGAcggcttgcacgatgttccttt                               |
| 0290_PcopF 3' NdeI+RBS  | TTTTCATATGTATATCTCCTTCTTAAAtgtgcgac<br>tctgtattccgacgc        |
| 0372_PcopL 5' XbaI      | TTTTTCTAGAcgaccagcatcctgtactacgt                              |
| 0373_PcopL 3' NdeI+RBS  | TTTTCATATGTATATCTCCTTCTTAAAggctca<br>ctttttgcggg              |
| 0374_PcopQ 5' XbaI      | TTTTTCTAGAccggcgacagtccaaca                                   |
| 0375_PcopQ 3' NdeI+RBS  | TTTTCATATGTATATCTCCTTCTTAAAcgcaatctcc<br>aagaggttggttcag      |
| 0376_PcopE 5' XbaI      | TTTTTCTAGAcgcgaatagcgcaaccgagatt                              |
| 0377_PcopE 3' NdeI+RBS  | TTTTCATATGTATATCTCCTTCTTAAAcgtgacgcg<br>aggctttggcgtaa        |
| 0378_PcopT 5' XbaI      | TTTTTCTAGAcgcaaggagatctgtgcg                                  |
| 0379_PcopT 3' NdeI+RBS  | TTTTCATATGTATATCTCCTTCTTAAATCGGAA<br>Atgagtgaattcgattcg       |
| 0380_PcopM 5' XbaI      | TTTTTCTAGAcgaggaaaagattgtattcattaccgatgaa                     |
| 0381_PcopM 3' NdeI+RBS  | TTTTCATATGTATATCTCCTTCTTAAAttaatttta<br>ttccggaccgagcagc      |
| 0396_MjDOD 5' NdeI      | TTTTCATATGaaaggaacatactatataaatcatggtgat                      |
| 0397_MjDOD 3' XhoI      | TTTTCTCGAGatcagtttttgagtgggtgggagtg                           |
| 0434_mPcopE(G) 5' XbaI  | TTTTTCTAGAcgcgaatagcgcaaccgGgatt                              |
| 0435_mPcopF(G) 5' XbaI  | TTTTTCTAGAcggcttgcGcgatgttccttt                               |
| 0436_mPcopL(G) 5' XbaI  | TTTTTCTAGAcgaccagcGtctgtactacgt                               |

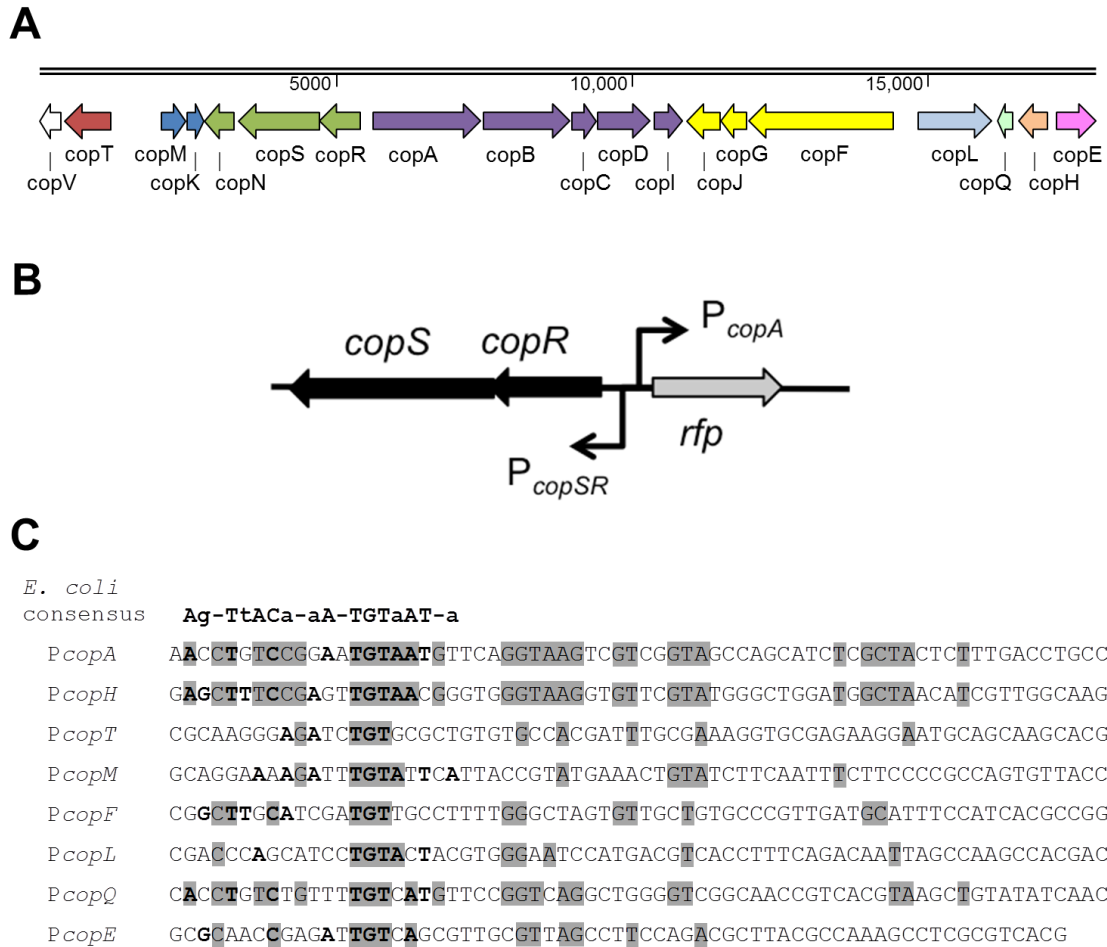

**Figure S1** (A) The *cop* cluster of *C. metallidurans* CH34 pMOL30. Genes belonging to the same operon are shown in the same color. (B) Schematic representation of the biosensor construction in this work. The promoter *P<sub>copA</sub>* was replaced by other *cop* promoters, including *P<sub>copH</sub>*, *P<sub>copT</sub>*, *P<sub>copM</sub>*, *P<sub>copF</sub>*, *P<sub>copL</sub>*, *P<sub>copQ</sub>*, and *P<sub>copE</sub>*. (C) The sequences of *cop* promoters used in this work. They are aligned with *E. coli* *pco* promoter consensus sequence<sup>4</sup> which is indicated in boldface. The identical sequences between eight promoters were highlighted in grey.



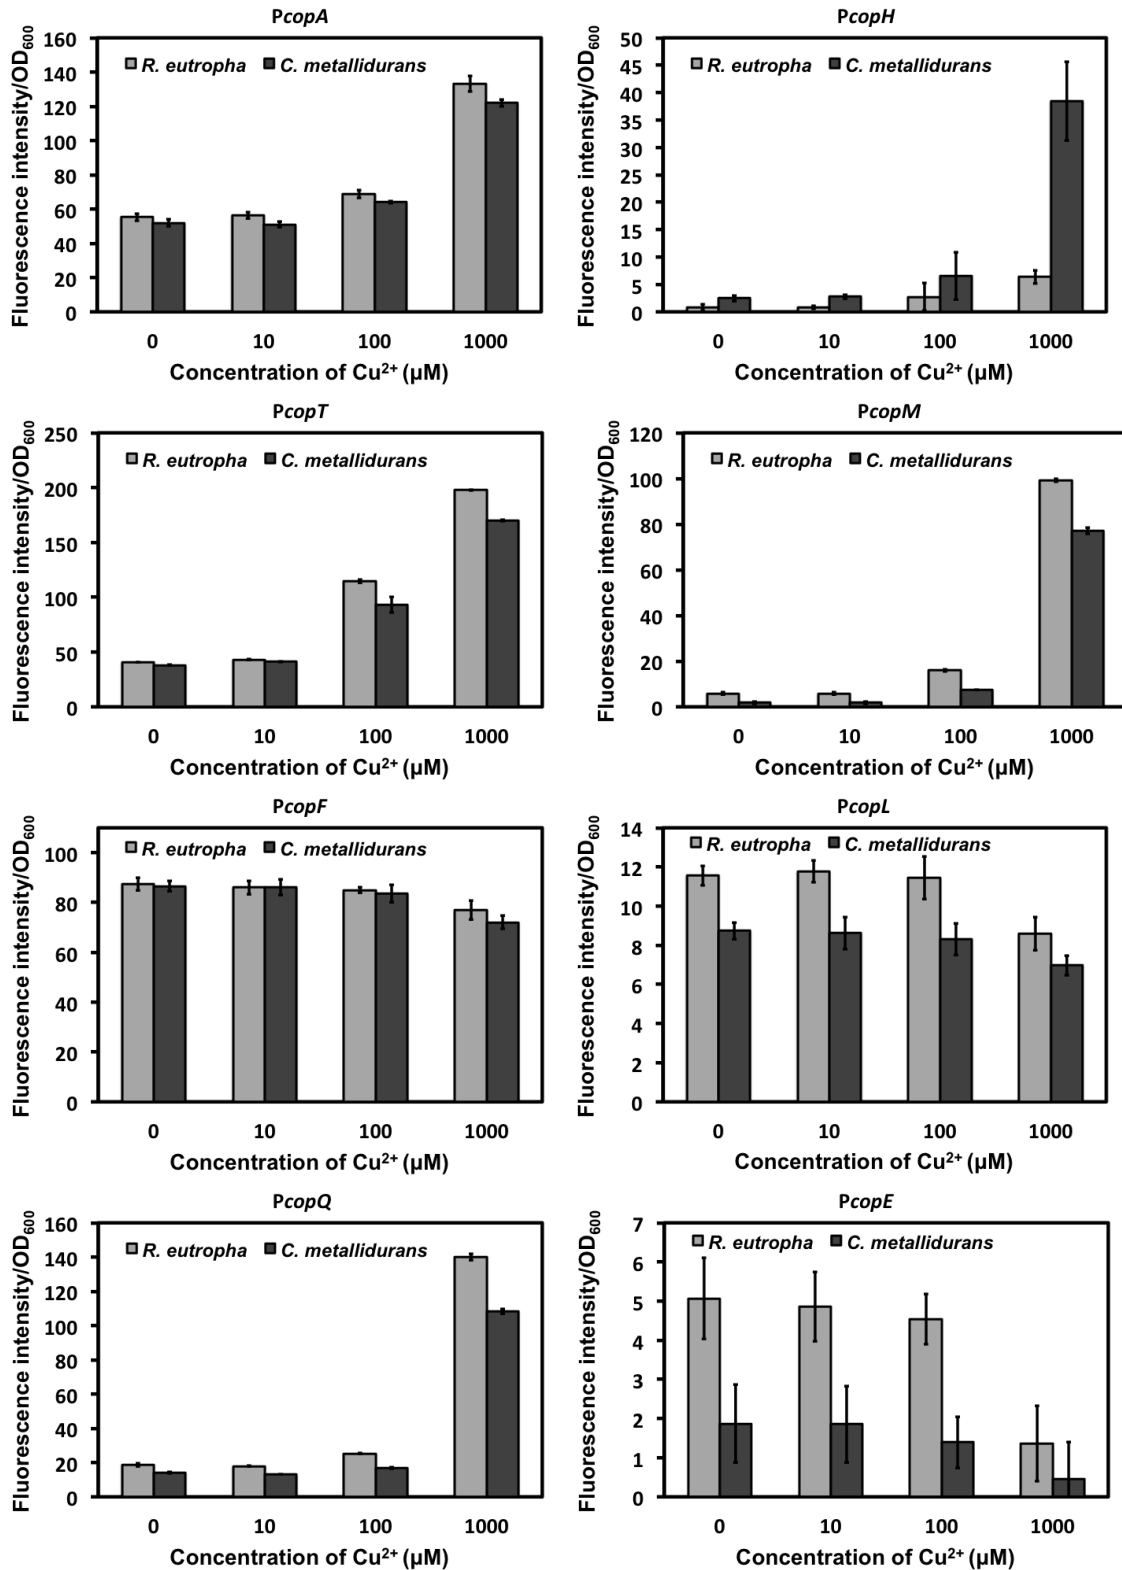

**Figure S2** Normalized RFP fluorescence intensities of *R. eutropha* and *C. metallidurans* harboring *copS-copR-PcopSR-cop promoter-rfp*. Error bars represent the standard deviation from triplicate measurements.

**Table S4 Comparison between linear ranges obtained with several whole-cell based biosensors for the detection of copper ions.**

|        | regulator                                             | reporter gene | host strain                                                             | range of calibration curve | reference                                                                          |
|--------|-------------------------------------------------------|---------------|-------------------------------------------------------------------------|----------------------------|------------------------------------------------------------------------------------|
| copper | <i>Pseudomonas putida</i><br><b>CueR</b>              | <i>gfp</i>    | <i>Pseudomonas putida</i> ATCC 17485                                    | 15~1000 $\mu$ M            | Li, P. S., Z. W. Peng, J. Su and H. C. Tao (2014) <sup>5</sup>                     |
| copper | <i>Escherichia coli</i><br><b>CusSR</b>               | <i>gfp</i>    | <i>Escherichia coli</i> XL1-Blue                                        | 1~100 $\mu$ M              | Ravikumar, S., V. D. Pham, S. H. Lee, I. K. Yoo and S. H. Hong (2012) <sup>6</sup> |
| copper | <i>Cupriavidus metallidurans</i> CH34<br><b>CopSR</b> | <i>rfp</i>    | <i>Cupriavidus metallidurans</i> CH34 and <i>Ralstonia eutropha</i> H16 | 0~1000 $\mu$ M             | This study                                                                         |

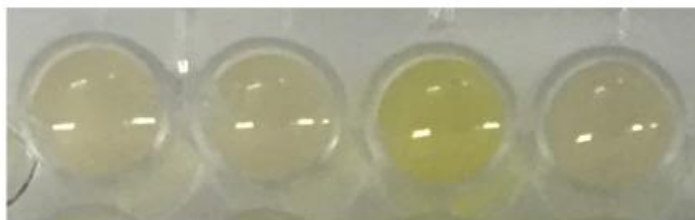

|                  |   |   |   |   |
|------------------|---|---|---|---|
| <b>Arabinose</b> | - | + | + | - |
| <b>L-DOPA</b>    | - | - | + | + |

**Figure S3** Images of *C. metallidurans* cells harboring *pBAD-MjDOD*. Arabinose and L-DOPA were used at final concentrations of 0.2% and 1mM, respectively.

## Reference

1. R. Simon, U. Priefer and A. Puhler, *Bio-Technol*, 1983, **1**, 784-791.
2. Y. C. Yeh, J. Muller, C. Bi, N. J. Hillson, H. R. Beller, S. R. Chhabra and S. W. Singer, *Chem Commun (Camb)*, 2013, **49**, 910-912.
3. N. Sasaki, Y. Abe, Y. Goda, T. Adachi, K. Kasahara and Y. Ozeki, *Plant & cell physiology*, 2009, **50**, 1012-1016.
4. D. A. Rouch and N. L. Brown, *Microbiology*, 1997, **143**, 1191-1202.
5. P.-S. Li, Z.-W. Peng, J. Su and H.-C. Tao, *Biotechnology letters*, 2014, **36**, 761-766.
6. S. Ravikumar, I. K. Yoo, S. Y. Lee and S. H. Hong, *Applied biochemistry and biotechnology*, 2011, **165**, 1674-1681.
